---

1 **Impacts of diets fed after weaning on gut microbiota and**  
2 **susceptibility to DSS-induced colitis in mice**

3 **Yu Meng, PhD,<sup>2</sup> Xiaojun Li, MD,<sup>2</sup> Shuijiao Chen, PhD,<sup>1\*</sup> Fujun Li,**  
4 **PhD,<sup>1</sup> Yani Yin, PhD,<sup>2</sup> Jianping Liu, PhD,<sup>2</sup> Fanggen Lu, PhD,<sup>2</sup>**  
5 **Xiaowei Liu, PhD<sup>1</sup>**

6 <sup>1</sup> Department of Gastroenterology, Xiangya Hospital of Central South  
7 University, Changsha, Hunan 410008, China

8 <sup>2</sup> Department of Gastroenterology, 2nd Xiangya Hospital of Central  
9 South University, Changsha, Hunan 410011, China

10 \* Corresponding author: Shuijiao Chen, PhD, Department of  
11 Gastroenterology, Xiangya Hospital of Central South University,  
12 Changsha, Hunan 410008, China. [shuijiaoxy@163.com](mailto:shuijiaoxy@163.com).

13

14

15

16

17

---

1 **Abstract**

2 **Background:**

3 Living in a sanitary environment and taking Western-style diet in  
4 early life are both risk factors for inflammatory bowel disease and  
5 important factors for shaping host gut microbiota. Here, we aimed to  
6 establish whether different dietary composition fed during the early  
7 period after weaning would associate the susceptibility to  
8 DSS-induced colitis with different gut microbiota shifts.

9 **Methods:** Eighty weaned Balb/c mice were fed with high sugar, fat,  
10 protein, fiber, and standard diet for 8weeks respectively. Inflammation  
11 was induced by administration of 2.5% (wt/vol) dextran sulfate sodium  
12 (DSS) in drinking water for 7 days, and the microbiota characterized  
13 by 16s rRNA based pyrosequencing. Analyzed the inflammatory  
14 factors and toll-like receptors by Real-time PCR

15 **Results:**

16 The high protein and high fiber+protein group exacerbated severity of  
17 DSS-induced colitis, the high fiber and high protein+fiber groups had  
18 the effect of reducing colitis, and the high sugar, fat and standard

1 group show the similar disease phenotype of colitis. The diversity and  
2 richness of the microflora were significantly decreased in the high fiber  
3 group, while only decreased richness of flora was observed in the high  
4 protein group. The abundance of *Firmicutes* was decreased and the  
5 abundance of *Bacteroides* was increased in the high fat, high sugar,  
6 high protein and high fiber groups, especially in the high protein and  
7 high fiber group. The microbial community structure was slightly  
8 different at the species/genus level. The microbial community  
9 structure of high protein-fiber group and high fiber-protein group was  
10 still similar.

## 11 **Conclusions:**

12 Mice were fed with different dietary compositions of high sugar, fat,  
13 protein and fiber diets since weaning, and similar gut microbiota of  
14 high-abundance *Bacteroides* and low-abundance *Firmicutes* are  
15 formed in adult mice. These microbiota do not cause colonic mucosal  
16 damage directly. Only high protein diet aggravated DSS-induced  
17 colitis, while high fiber diet alleviated the colitis.

18 **Key words:** mice, colitis, DSS, unbalance diet, microbiota.

---

## 1 **Introduction**

2       The pathogenesis of inflammatory bowel disease (IBD) is  
3 considered to be intolerance of the genetically susceptible individuals  
4 to gut microbiota, triggering a dysregulated immune response  
5 resulting in inflammatory injuries of intestinal mucosa [1-3].  
6 Epidemiologic data show that the incidence of IBD among  
7 first-generation immigrants to regions with high incidence of IBD is as  
8 low as that among natives in the countries from which they emigrated,  
9 yet second-generation immigrants have an increased risk of IBD  
10 similar to that in locations to which they immigrated [4]. The variance in  
11 the disease incidence cannot be solely attributed to genetic  
12 susceptibility, suggesting environmental factors exposed in early life  
13 play important roles in the development of IBD [4,5]. Current evidences  
14 support risk factors associated with IBD include hygiene hypothesis,  
15 Cesarean section, formula feeding, and antibiotic use in infants and  
16 young children [6-8]. Differences in delivery mode, infant feeding type,  
17 sanitary condition and antibiotic use have also been linked with  
18 differences in the intestinal flora of babies and children [9]. Several  
19 studies have demonstrated marked alterations in the gut microbiota of  
20 patients with IBD [10-12]. Thus, the composition of gut microbiota is

---

1 associated with IBD.

2 Studies have found significant differences in fecal microflora  
3 between people eating western diet and people from regions where  
4 fiber content is high in the diet, revealing impacts of different diets in  
5 shaping gut microbiota [13,14]. Recent reports indicate that the gut  
6 microbiota and alterations thereof, due to a consumption of  
7 a diet high in saturated fats and low in fibers, can trigger factors  
8 regulating the development of IBD [15]. The incidence of IBD is steadily  
9 rising in developed as well as in developing countries paralleling the  
10 escalating consumption of western-style diets, characterized by high  
11 protein and fat as well as excessive sugar intake, with less vegetables  
12 and fiber [16]. Animal studies also find that “western-style” diets can  
13 lead to intestinal flora shifts in mice and aggravate inflammatory  
14 injuries of colonic mucosa induced by DSS [17]. All these findings  
15 suggest that changes in dietary composition contribute to the  
16 development of IBD by altering the structure of gut microbiota.

17 In the recent years, the incidence of pediatric IBD is rapidly on the  
18 rise, indicating that gut microbiota shaped in early life is related to the  
19 risk of IBD [18]. The development of intestinal flora consists of two

---

1 stages, one is lactation and the other is exposure to environment and  
2 diet after weaning <sup>[19]</sup>. A comparative study has found similarities in  
3 fecal microflora between European children of preweaning and  
4 children of the same age from rural Africa, and significant differences  
5 between European children aged 2 to 6 years and children of same  
6 age from Africa <sup>[20]</sup>. A recent analysis of the intestinal flora composition  
7 of one infant followed over 2.5 years showed a considerable alteration  
8 in the microflora with the introduction of solid foods and a shift towards  
9 a more stable, adult-like microbiota with weaning <sup>[21]</sup>. By 3 years of age,  
10 microbiota composition approaches that of adults <sup>[21]</sup>. These results  
11 indicate that the development of intestinal flora after weaning is  
12 influenced by diets. Thus, the development of gut microbiota during  
13 the early period after weaning may be related to the development of  
14 IBD.

15 Taken together, we propose a hypothesis that different dietary  
16 composition fed during the early period after weaning may affect the  
17 risk of the development of IBD by different gut microbiota shifts.  
18 Therefore, the aim of this study is to investigate the developments of  
19 gut microbiota compositions in mice fed on different diets after  
20 weaning as well as the susceptibility to DSS-induced colitis.

---

## 1 **Methods**

### 2 **Animals, diets and experimental design**

3 A total of eighty weaned female Balb/c mice (weight  $12\pm 0.8$  g) were  
4 caged under standard conditions (20-22°C, 50-55% humidity, 12/12h  
5 dark/light cycle), and randomly assigned to eight groups (10 mice in  
6 each group): control group (Con), standard group (Sta), group with  
7 high sugar (Sug), group with high fat (Fat), group with high protein  
8 (Pro), group with high fiber (Fib), group with one-month high protein  
9 and one-month high fiber (Pro+Fib), group with one-month high fiber  
10 and one-month high protein (Fib+Pro) (Table 1). All mice were  
11 provided with water and diets, and the calories were balanced in all  
12 the groups every day. The stool of mice was collected once after  
13 8-week treatment and stored at -70°C for further analysis.

14 Susceptibility to colitis was tested by the administration of 2.5% (wt/vol)  
15 dextran sulfate sodium (DSS; Molecular Weight 36000-50000, MP  
16 Biomedicals, LLC, Solon, OH, USA) in the drinking water for 7 days  
17 after 8-week treatment. The animals were weighed weekly and the  
18 length of colon was measured following CO<sub>2</sub> asphyxiation at the end  
19 of experiments. This study was approved and monitored by the Ethics  
20 Committee of the 2nd Xiangya Hospital of Central South University,

1 China.

2

### 3 **Disease activity index**

4 Disease activity index (DAI) was quantified using the parameters of  
5 weight loss, stool consistency, and gross blood in the feces which  
6 were recorded daily for each animal [22].

7

### 8 **Histological analysis**

9 Colons were immediately excised, rinsed with ice-cold  
10 phosphate-buffered saline. 2 sections were snap-frozen in liquid  
11 nitrogen and stored at -70°C for RNA isolation and protein preparation.  
12 Tissue sections from the distal colon were fixed in 10% buffered  
13 formalin and embedded in paraffin. The sections were cut as 6 mm  
14 and stained with hematoxylin and eosin (H&E).

15

### 16 **RNA extraction and quantitative RT-PCR**

17 Total RNA from colonic tissue samples was extracted using the  
18 Eastep™ Total RNA Extraction Kit (Promega) according to the  
19 manufacturer's protocol. RNA concentration was determined  
20 spectrophotometrically. The RNA was reverse transcribed into cDNA



1 using the GoScript™ Reverse Transcription System (Promega).  
2 Quantitative real-time polymerase chain reaction (PCR) was  
3 performed for CGRP with GoTaq® qPCR Master Mix (Promega) using  
4 the DNA-binding dye, carboxy-X-rhodamine (CXR) reference dye  
5 (identical to ROX™ dye), for the detection of PCR products on a  
6 ViiATM7 Real-Time PCR system (ABI).

7       Amplification of MUC2, TLR2, TLR4, TLR5 and glyceraldehyde  
8 phosphate dehydrogenase (GAPDH) was routinely performed.  
9 The PCR amplification profiles consisted of hot-start activation at 95°C  
10 for 10 min, followed by cycles of denaturation at 95°C for 15 s,  
11 annealing at 60°C for 30 s and extension at 72°C for 15 s. A  
12 dissociation stage was added at 95°C for 15 s, 60°C for 15 s, and 95°C  
13 for 15 s. Melting curve analysis of amplification products was  
14 performed at the end of each PCR reaction. Each PCR reaction was  
15 performed in triplicate, and the mean Ct value was calculated.  
16 Relative fold changes in RNA levels were calculated by the  $\Delta\Delta\text{Ct}$   
17 method.

18

19 **Pyrosequencing of fecal microbiota and bioinformatic analysis**

---

1 Genomic DNA was extracted from the stool of enrolled mice (3 mice  
2 per group) using the QIAamp DNA Stool Mini kit ( Qiagen, Germany ).  
3 The extracted DNA was amplified using primers targeting the V1 to V3  
4 hypervariable regions of bacterial 16S rRNA gene (27F:  
5 5'-AGAGTTTGATCCTGGCTCAG-3', 533R:  
6 5'-TTACCGCGGCTGCTGGCAC-3'). PCR reaction mixtures were  
7 denatured at 95°C for 2 min followed by 25 cycles of denaturation at  
8 95°C for 30 sec, annealed at 55°C for 30 sec, and elongated at 72°C  
9 for 30 sec. DNA sequencing was performed using a 454 GS FLX  
10 Titanium Sequencing System (Roche, USA).

11 Mothur software (Mothur v.1.25.1; <http://www.mothur.org>) was used  
12 to process the sequence data [23]. Sequencing reads from the different  
13 samples were sorted by unique barcodes. Primers and barcodes were  
14 trimmed from each read. To minimize the sequencing errors, chimeric  
15 sequences were removed using UCHIME (<http://drive5.com/uchime>).  
16 Low-quality sequences were excluded if the sequences met one of the  
17 following criteria: (1) sequences with more than two inexact match to  
18 forward primer; (2) sequences with unrecognizable reverse primer; (3)  
19 sequences with a length of < 200 nucleotides; (4) sequences with  
20 undetermined bases in the sequence read; (5) sequences with

1 average quality < 25. The trimmed sequences were clustered into  
2 operational taxonomic units (OTUs) by setting a 0.03 distance limit  
3 (97% of similarity). The alpha diversity (Shannon index and Simpson  
4 index) and richness (ACE and Chao1) were analyzed based on  
5 identified OTUs using the Mothur program. Representative sequence  
6 of each OTU was taxonomically classified using the Silva database<sup>[24]</sup>  
7 at a 70% confidence threshold with Mothur.

8

## 9 **Results**

### 10 **Effects of different diets on the expression of MUC2, TLR2, TLR4,** 11 **TLR5, IL-1 $\beta$ and IL-6**

12 The expression of MUC2, TLR4 and TLR5 had no difference in all  
13 groups before adding the DSS (Fig 3,  $P > 0.05$ ). The expression of  
14 TLR2 in the Sug group was higher than the other groups before  
15 adding the DSS (Fig 3D,  $P < 0.05$ ), had no difference between the Pro  
16 group and the Fib group (Fig 3D,  $P > 0.05$ ), and had no difference  
17 between the Pro+Fib group and the Fib+Pro group (Fig 3D,  $P > 0.05$ ).  
18 After adding the DSS, the expression of IL-1 $\beta$  was highest in the Pro  
19 group, and had significant difference with the other groups (Fig 3A,  $P$   
20  $< 0.05$ ). The expression of IL-6 was lowest in the Fib group, and had

1 significant difference with the other groups (Fig 3B,  $P < 0.05$ ).

2

### 3 **Effects of different diets on DSS induced colitis in the mice**

4 After 7 days of DSS administration, the mice in the Sta, Sug, Fat,  
5 Pro and Fib+Pro groups developed significant weight loss, diarrhea,  
6 rectal bleeding, and physical weakness compared to the control mice  
7 treated with PBS. The mice in Pro group and Fib+Pro group showed  
8 significantly aggravated colitis compared with the other groups ( $P <$   
9  $0.05$ ), with more colon shrinking, more body weight loss and higher  
10 DAI. However, little DSS-induced bleeding and significantly less colon  
11 shrinking or DAI were observed in the Fib or Pro+Fib groups (Fig 1, 2).  
12 DSS induction resulted in the epithelial destruction, edema,  
13 ulcerations, goblet cell depletion, and intense inflammatory infiltration  
14 compared to non-DSS-treated controls, with the most serious effects  
15 in Pro group.

16

### 17 **Microbial diversity in the gut of mice consuming different diets**

18 To determine the changes of microbial diversity in mice fed with  
19 different diets we performed pyrosequencing on the stool of each  
20 group of mice. Pyrosequencing of 16S rRNA gene barcoded

1 amplicons resulted in a total of 111,920 high-quality sequences, with a  
2 mean of 7,461 sequences (range 4,271-9,337) per sample. The  
3 Simpson index and ACE did not differ among different groups ( $P >$   
4  $0.05$ ). OTU (97%) of the Fat group was more than that of Pro and Fib  
5 group ( $P < 0.05$ ), and OTU (97%) of the Fib group was less than that  
6 of the Sta group (Table 3,  $P < 0.05$ ). Shannon index was significantly  
7 different in Fib group compared to the Sug and Fat group (Table 2,  $P$   
8  $< 0.05$ ). Chao 1 was significantly different between Fib group and Fat  
9 group (Table 3,  $P < 0.05$ ).

10 From the Venn Diagram (Fig 4A), we can see that the OTU in the  
11 Pro group has 31.82% similarity with the Fib group, 31.72% similarity  
12 with the Fat group, 30.72% similarity with the Sug group, and 37.56%  
13 similarity with the other groups. The OTU in the Fib group has 43.35%  
14 similarity with the Pro group, and 46.28% similarity with the other  
15 groups. The OTU in the Fat group has 24.4% similarity with the Pro  
16 group, 37.39% similarity with the Sug group, and 51.64% similarity  
17 with the other groups. The OTU in the Sug group has 25.11%  
18 similarity with the Pro group, 39.73% similarity with the Fat group, and  
19 51.39% similarity with the other groups.

20 Different nutrients significantly affected the relative abundance of

1 bacteria. *Bacteroidetes* and *Firmicutes* were the most abundant  
2 bacteria. Other predominant bacteria were *Actinobacteria*,  
3 *Deferribacteres*, *Proteobacteria*, *Tenericutes* and *Verrucomicrobia*.  
4 The amount of *Bacteroidetes* was the most in the Pro and Fib groups,  
5 and the least in fat and sugar groups ( $P < 0.05$ ). In contrast, the  
6 amount of *Firmicutes* was the least in the Pro and Fib groups, and the  
7 most in fat and sugar groups ( $P < 0.05$ ).

8 For bacterial genus, *Bacteroides* was the most abundant in Fib and  
9 Pro group, with no significant difference between them ( $P > 0.05$ ).  
10 *Blautia* and *Parasutterella* was the most in Fib group compared with  
11 the other groups ( $P < 0.05$ ). The amounts of *Blautia*, *Lactococcus* and  
12 *Parasutterella* were only 1.76% and 0.34% in the Fib and Pro group,  
13 respectively ( $P < 0.05$ ) (Fig 4B). The composition of bacteria was the  
14 most similar between Fib and Pro groups, among all groups. For  
15 bacterial species, *Allobaculum uncultured bacterium* and *Bacteroides*  
16 *vulgatus* were the most in Fib group compared with the other groups  
17 ( $P < 0.05$ ). There were 22 different species of bacteria between Pro  
18 and Fib groups (Fig 4C,  $P < 0.05$ ), such as *Bacteroides vulgatus*,  
19 *Allobaculum uncultured bacterium*, *Blautia uncultured bacterium*,  
20 *Parasutterella uncultured bacterium*, *Blautia producta*, *Allobaculum*

1 *uncultured bacterium* and *butyrate-producing bacterium L2-10*.

2

3 **Feeding order of high fiber and high protein led to the changes in**  
4 **microbial diversity**

5 To further investigate whether the feeding order of dietary fiber or  
6 protein results in microbiota shift, we collected the stool of the Pro+Fib  
7 and Fib+Pro groups for Pyrosequencing.

8 From the Venn Diagram (Fig 5A), we can see that the OTU in the  
9 Pro+Fib group has 69.58% similarity with the Fib+Pro group, 55.85%  
10 similarity with the Pro group, 19.19% similarity with the Fib group, and  
11 20.44% similarity with the other groups. The OTU in the Fib+Pro  
12 group has 76.90% similarity with the Pro+Fib group, 59.83% similarity  
13 with the Pro group, 18.10% similarity with the Fib group, and 13.97%  
14 similarity with the other groups. The OTU in the Fib group has 63.73%  
15 similarity with the Pro+Fib group, 54.40% similarity with the Fib+Pro  
16 group, and 9.84% similarity with the other groups. The OTU in the Pro  
17 group has 75.37% similarity with the Pro+Fib group, 73.05% similarity  
18 with the Fib+Pro group, and 5.89% similarity with the other groups.

19 No significant difference in bacterial phylum was found between  
20 Pro+Fib and Fib+Pro groups. For bacterial genus, *Candidatus*

1 *Arthromitus*, *Enterorhabdus*, *Escherichia-Shigella*, *RF9 norank* and  
2 *Turicibacter* were different in Pro+Fib and Fib+Pro group (Fig 5B,  $P <$   
3 0.05), with most significant change of *Escherichia-Shigella* and  
4 *Turicibacter*. In addition, 15 different species of bacteria were  
5 detected between Pro+Fib and Fib+Pro groups (Fig 5C,  $P <$  0.05),  
6 such as *Lachnospiraceae bacterium 539*, *Lactobacillus sp. ls79* and  
7 *mouse gut metagenome*.

8

## 9 **Discussion**

10 Living in sanitary environment and taking western-style diets at  
11 early life are considered to be risk factors for IBD, and important  
12 factors for shaping intestinal flora as well [25]. Therefore, both dietary  
13 composition and gut microbiota play an important role in the  
14 pathogenesis of IBD. The aim of this study was to analyze that adult  
15 mice responded to DSS and the structure of gut microbiota in newly  
16 weaned mice which fed with different components diets, in order to  
17 understand what dietary components and microbiota are associated  
18 with DSS-induced colitis. The results showed that mice fed with  
19 different dietary ingredients developed into three different disease  
20 phenotypes of DSS-induced colitis. The high protein diet exacerbates



---

1 severity of DSS-induced acute colitis which characterized by weight  
2 loss, increased DAI scores, shortened colon length and increased  
3 histological scores. The high fiber diet had the effect of reducing colitis.  
4 The high sugar, high fat and standard diet showed the similar disease  
5 phenotype of colitis. These results suggested that mice fed different  
6 diets in early life respond differently to DSS in adult mice.

7 In previous studies, adult mice fed high sugar, high fat and  
8 Western-style diets have been found to aggravate DSS-induced colitis  
9 [26,27]. However, in this study, adult mice fed with high sugar and high  
10 fat diets since early life did not aggravate DSS colitis. Obviously, the  
11 results were inconsistent between the two studies, and the difference  
12 between the two groups was the start time of high sugar and high fat  
13 diets feeding. It suggests that the colonic mucosa during the early  
14 stage of life is able to adapt with different diet. But, mutual adaptation  
15 does not explain the different responses of high protein and high fiber  
16 diets to DSS-induced colitis. In this study, weaning mice fed a high  
17 fiber diet for 4 weeks were converted to a high protein diet for 4 weeks,  
18 the result showed that the protective effect of the high fiber diet was  
19 lost and the high protein diet aggravated DSS-induced colitis. The  
20 other group which is converted the high protein diet to the high fiber

---

1 diet without aggravating DSS-induced colitis, also showing only high  
2 fiber diet to reduce colitis. Previous studies found that eating high fiber  
3 diet for more than 20 days could enhance the protection of colonic  
4 mucosa [28] and this study shows that the time of giving 4 week a kind  
5 of the diet can counteract the effect of another early diet. Therefore,  
6 the high protein diet weakens or the high fiber diet strengthens  
7 resistance to DSS-induced colitis need to take time for developing the  
8 ability.

9 Natural immune receptors TLR2, TLR4, TLR5 and pro-inflammatory  
10 cytokines IL-6, IL-1  $\beta$  in colon mucosa were detected. The levels of  
11 pro-inflammatory cytokines in the colon mucosa of mice were in the  
12 normal range before drinking DSS, and the levels of cytokines in  
13 colonic mucosa of DSS-exposed mice increased significantly,  
14 especially in the group which fed protein diet. These results suggest  
15 that early exposure to high protein and other unbalanced diets does  
16 not directly damage the mucosa. Some studies have shown that  
17 bacterial fermentation products of undigested proteins in colon are  
18 harmful to the mucosa [29-31]. However, colitis was only aggravated  
19 when DSS is encountered in our study, which indicated the  
20 mechanism of bacterial fermentation is not suitable for mice which

1 have adapted to high protein diet at the early stage of life.

2 The early stage of life is the critical period for the intestinal flora to  
3 mature into a stable adult microbiota. This study found that mice fed  
4 different diets after weaning had different phenotypes of DSS-induced  
5 colitis. Based on the clue of the disease phenotype, we tried to find  
6 out the relevant gut microbiota of DSS-induced colitis. Results  
7 showed that the gut microbiota of high fiber and high protein diets  
8 groups were similar, which is characterized by the decreased diversity  
9 and richness of the flora. The structure of gut microbiota had shown  
10 an interesting phenomenon that all mice which took the unbalance  
11 diets of high protein, fiber, fat, and sugar had very similar microbiota of  
12 the decreased abundance of *Firmicutes* and the increased abundance  
13 of *Bacteroides*. The microbiota alternation is similar to the dysbiosis in  
14 IBD patients, which is seems to be related to pathogenesis of IBD [32].  
15 In fact, the researches in both IBD patients and animal studies have  
16 shown that high fiber diet protect colon mucosa, and high protein diet  
17 aggravate colon mucosa damage [26,28,33]. Obviously, the bacteria  
18 shaped by high fiber and protein diets in early life were not associated  
19 with IBD and DSS-induced colitis significantly. Because the evidence  
20 of dysbiosis in IBD mostly comes from the patients, and the structure

1 of the microbiota cannot be known before the onset of the disease. In  
2 species/genus level, the result showed that the abundance of  
3 *Bacteroides vulgatus*, *Akkermansia uncultured bacterium* and  
4 *butyrate-producing bacterium L2-10* were higher in the mice with high  
5 fiber diet, these bacteria played beneficial roles in the colon<sup>[34]</sup>. This  
6 may partly explain why fiber supplement can decrease the severity of  
7 DSS induced colitis. On the other hand, high protein diets have been  
8 shown to increase the abundance of bacterial species that belonged  
9 to *Fusobacteriales*, *Coriobacteriales* and *Clostridiales*<sup>[35]</sup>.  
10 *Fusobacteriales* are implicated in many different inflammatory  
11 processes, including colonic inflammation <sup>[36,37]</sup>. However, in this study  
12 there were no significant difference in *Fusobacteriales* in each group,  
13 which cannot explain why protein diet can aggravate the colitis.  
14 Therefore, the early adaptation of bacteria to intestinal mucosa may  
15 not damage the colonic mucosa. In our study, although we found that  
16 the bacteria between the mice with high fiber and the mice with high  
17 protein were the most similar, there were still some different bacteria  
18 between the two groups. Several of them, such as  
19 *Bacteroidesvulgatus*, *Akkermansia uncultured bacterium*,  
20 *butyrate-producing bacterium L2-10* and *Rikenella*, may play

1 important roles in the development of colitis and further studies are  
2 needed to confirm their contributions to UC.

3

#### 4 **Conclusion**

5

6 Mice were fed with different dietary compositions of high sugar, fat,  
7 protein, and fiber since weaning, and similar intestinal flora of  
8 high-abundance *Bacteroides* and low-abundance *Firmicutes* are  
9 formed in adulthood. These microbiota do not cause colonic mucosal  
10 damage directly. Only a high protein diet aggravated DSS induced  
11 colitis, while high fiber diet alleviated the colitis.

12

#### 13 **References**

- 14 1. Khor B, Gardet A, Xavier RJ. Genetics and pathogenesis of  
15 inflammatory bowel disease. *Nature* 2011;474:307-317.
- 16 2. Xavier RJ, Podolsky DK. Unravelling the pathogenesis of  
17 inflammatory bowel disease. *Nature*. 2007;448:427-444.
- 18 3. Kau AL, Ahern PP, Griffin NW, Goodman AL, Gordon JI. Human  
19 nutrition, the gut microbiome and the immune system. *Nature*  
20 2011;474:327-336.
- 21 4. Williams C N. Does the incidence of IBD increase when persons

- 
- 1           move from a low- to a high-risk area? *Inflamm. Bowel Dis.*, 2008,
- 2           14 Suppl 2: S41-2.
- 3   5.           Ananthakrishnan A N. Environmental risk factors for
- 4           inflammatory bowel disease. *Gastroenterol Hepatol*, 2013,
- 5           9(6):367-374.
- 6   6.           Voutilainen M, Hutrikähönen N, Tossavainen P, et al. Low
- 7           childhood high density lipoprotein cholesterol levels and
- 8           subsequent risk for chronic inflammatory bowel disease. *Dig*
- 9           *Liver Dis*, 2018, 50(4).
- 10   7.          Bager P, Simonsen J, Nielsen N M, et al. Cesarean section and
- 11          offspring's risk of inflammatory bowel disease: a national cohort
- 12          study. *Inflammatory Bowel Diseases*, 2012, 18(5):857-862.
- 13   8.           Ananthakrishnan A N. Epidemiology and risk factors for IBD.
- 14           *Nature Reviews Gastroenterology & Hepatology*, 2015,
- 15           12(4):205.
- 16   9.           Forbes J D, Azad M B, Vehling L, et al. Association of Exposure
- 17           to Formula in the Hospital and Subsequent Infant Feeding
- 18           Practices With Gut Microbiota and Risk of Overweight in the
- 19           First Year of Life. *Jama Pediatrics*, 2018:e181161.
- 20   10.          Gophna U, Sommerfeld K, Gophna S, et al. Differences between

- 
- 1 tissue-associated intestinal microfloras of patients with Crohn's  
2 disease and ulcerative colitis. *Journal of Clinical Microbiology*,  
3 2006, 44(11):4136.
- 4 11. Hedin C R, Mccarthy N E, Louis P, et al. Altered intestinal  
5 microbiota and blood T cell phenotype are shared by patients  
6 with Crohn's disease and their unaffected siblings. *Gut*, 2014,  
7 63(10):1578.
- 8 12. Mottawea W, Chiang C K, Mühlbauer M, et al. Altered intestinal  
9 microbiota–host mitochondria crosstalk in new onset Crohn's  
10 disease. *Nature Communications*, 2016, 7:13419.
- 11 13. Zhang N, Ju Z, Zuo T. Time for food: the impact of diet on gut  
12 microbiota and human health. *Nutrition*, 2018, 51-52:80.
- 13 14. Salonen A, de Vos W M. Impact of diet on human intestinal  
14 microbiota and health. *Annu Rev Food Sci Technol*, 2014,  
15 5(1):239-262.
- 16 15. Uranga J A, López-Miranda V, Lombó F, et al. Food, nutrients  
17 and nutraceuticals affecting the course of inflammatory bowel  
18 disease. *Pharmacological Reports*, 2016, 68(4):816-826.
- 19 16. Borrelli O, Cordischi L, Cirulli M, et al. Polymeric diet alone  
20 versus corticosteroids in the treatment of active pediatric

- 
- 1 Crohn's disease: a randomized controlled open-label trial. Clin  
2 Gastroenterol Hepatol 2006;4(6):744-53.
- 3 17. Kim I W, Myung S J, Do M Y, et al. Western-style diets induce  
4 macrophage infiltration and contribute to colitis-associated  
5 carcinogenesis. Journal of Gastroenterology & Hepatology,  
6 2010, 25(11):1785-1794.
- 7 18. Koletzko S, Walkersmith J A, Lebenthal E, et al. Epidemiology in  
8 pediatric inflammatory bowel disease. Pediatric Inflammatory  
9 Bowel Disease. Springer New York, 2013:537-550.
- 10 19. Martin M A, Sela D A. Infant Gut Microbiota: Developmental  
11 Influences and Health Outcomes. Building Babies: Primate  
12 Development in Proximate and Ultimate Perspective.  
13 2013:233-256.
- 14 20. De F C, Cavalieri D, Di P M, et al. Impact of diet in shaping gut  
15 microbiota revealed by a comparative study in children from  
16 Europe and rural Africa. Proceedings of the National Academy  
17 of Sciences of the United States of America, 2010,  
18 107(33):14691-6.
- 19 21. Koenig J E, Spor A, Scalfone N, et al. Succession of microbial  
20 consortia in the developing infant gut microbiome. Proc Natl



- 
- 1 Acad Sci U S A, 2011, 108(Suppl 1):4578-4585.
- 2 22. Hogan SP, Seidu L, Blanchard C, Groschwitz K, Mishra  
3 A, Karow ML, et al. Resistin-like molecule beta regulates innate  
4 colonic function: barrier integrity and inflammation susceptibility.  
5 The Journal of allergy and clinical immunology  
6 2006;118:257-268.
- 7 23. Schloss PD, Westcott SL, Ryabin T, Hall JR, Hartmann M,  
8 Hollister EB, et al. Introducing mothur: open-source,  
9 platform-independent, community-supported software for  
10 describing and comparing microbial communities. Applied and  
11 environmental microbiology 2009;75:7537-7541.
- 12 24. Quast C, Pruesse E, Yilmaz P, Gerken J, Schweer T, Yarza P,  
13 et al. The SILVA ribosomal RNA gene database project:  
14 improved data processing and web-based tools. Nucleic acids  
15 research 2013;41:D590-596.
- 16 25. Levine A, Sigall B R, Wine E. Evolving role of diet in the  
17 pathogenesis and treatment of inflammatory bowel diseases.  
18 Gut, 2018, 67(9):gutjnl-2017-315866.
- 19 26. Lee Dale,Albenberg Lindsey,Compher Charlene et al. Diet in the  
20 pathogenesis and treatment of inflammatory bowel

- 
- 1 diseases. *Gastroenterology*, 2015, 148(6): 1087-106.
- 2 27. Jantchou P, Morois S, Clavel-Chapelon F, Boutron-Ruault  
3 MC, Carbonnel F. Animal protein intake and risk of inflammatory  
4 bowel disease: The E3N prospective study. *American journal*  
5 *of gastroenterology* 2010;105:2195-2201.
- 6 28. Silveira A L, Ferreira A V, de Oliveira M C, et al. Preventive  
7 rather than therapeutic treatment with high fiber diet attenuates  
8 clinical and inflammatory markers of acute and chronic  
9 DSS-induced colitis in mice. *European Journal of Nutrition*, 2015,  
10 56(1):1-13.
- 11 29. Arijs, I.; Vanhove, W.; Rutgeerts, P.; Schuit, F.; Verbeke, K.; De  
12 Preter, V. Decreased mucosal sulfide detoxification capacity in  
13 patients with Crohn's disease. *Inflamm. Bowel Dis.* 2013, 19,  
14 70–72.
- 15 30. Boudry, G.; Jamin, A.; Chatelais, L.; Gras-Le Guen, C.; Michel,  
16 C.; Le Huërou-Luron, I. Dietary protein excess during neonatal  
17 life alters colonic microbiota and mucosal response to  
18 inflammatory mediators later in life in female pigs. *J. Nutr.* 2013,  
19 143, 1225–1232.
- 20 31. Beaumont, M.; Andriamihaja, M.; Lan, A.; Khodorova, N.;

- 
- 1           Audebert, M.; Blouin, J.M.; Grauso, M.; Lancha, L.; Benetti, P.H.;
- 2           Benamouzig, R.; et al. Detrimental effects for colonocytes of an
- 3           increased exposure to luminal hydrogen sulfide: The adaptive
- 4           response. *Free Radic. Biol. Med.* 2016, 93, 155–164.
- 5    32.    Sokol H, Lay C, Seksik P, et al. Analysis of bacterial bowel
- 6           communities of IBD patients: what has it revealed?
- 7           *Inflammatory Bowel Diseases*, 2010, 14(6):858-867.
- 8    33.    Llewellyn S R, Britton G J, Contijoch E J, et al. Interactions
- 9           between diet and the intestinal microbiota alter intestinal
- 10          permeability and colitis severity in mice. *Gastroenterology*, 2017,
- 11          154(4).
- 12   34.    Halmos EP, Christophersen CT, Bird AR, Shepherd SJ, Gibson
- 13          PR, Muir JG. Diets that differ in their FODMAP content alter the
- 14          colonic luminal microenvironment. *Gut* 2015;64:93-100.
- 15   35.    Hang I, Rinttila T, Zentek J, Kettunen A, Alaja S, Apajalahti J, et
- 16          al. Effect of high contents of dietary animal-derived protein or
- 17          carbohydrates on canine faecal microbiota. *BMC veterinary*
- 18          *research* 2012;8:90.
- 19   36.    Swidsinski A, Dörffel Y, Loening-Baucke V, Theissig F, Rückert
- 20          JC, Ismail M, et al. Acute appendicitis is characterised by local

1 invasion with *Fusobacterium nucleatum/necrophorum*. Gut  
2 2011;60:34-40.

3 37. Ohkusa T, Yoshida T, Sato N, Watanabe S, Tajiri H, Okayasu I.  
4 Commensal bacteria can enter colonic epithelial cells and  
5 induce proinflammatory cytokine secretion: a possible  
6 pathogenic mechanism of ulcerative colitis. Journal of medical  
7 microbiology 2009;58:535-545.

8

1 **Table 1 The experiment scheme of food intervention**

| Groups        | Experiment scheme             |     |                               |        |
|---------------|-------------------------------|-----|-------------------------------|--------|
| Con group     | Standard feed                 |     |                               |        |
| Sta group     | Standard feed<br>2.5% DSS     |     |                               |        |
| Sug group     | High Sugar feed<br>2.5% DSS   |     |                               |        |
| Fat group     | High Fat feed<br>2.5% DSS     |     |                               |        |
| Pro group     | High Protein feed<br>2.5% DSS |     |                               |        |
| Fib group     | High Fiber feed<br>2.5% DSS   |     |                               |        |
| Pro+Fib group | High Protein feed             |     | High Fiber feed<br>2.5% DSS   |        |
| Fib+Pro group | High Fiber feed               |     | High Protein feed<br>2.5% DSS |        |
|               | 0                             | 4wk | 8wk                           | 8wk+7d |

2

3

4

5

6

7

8

9

10

1 **Table 2 OTUs (97%), alpha diversity (Shannon index, and**  
2 **Simpson index), richness (ACE and Chao1) for 16S rRNA**  
3 **libraries of stool**

---

| Group | OTU (97%)      | Shannon<br>index | Simpson<br>index | ACE             | Chao1          |
|-------|----------------|------------------|------------------|-----------------|----------------|
| Sta   | 1175.67±279.14 | 4.79±1.26        | 0.08±0.10        | 3390.67±1049.89 | 2373.33±679.01 |
| Sug   | 1120.33±220.51 | 5.38±0.50        | 0.02±0.01        | 3248.00±714.90  | 2268.33±426.16 |
| Fat   | 1222.00±81.56  | 5.38±0.14        | 0.02±0.00        | 3356.00±304.87  | 2406.67±227.39 |
| Pro   | 846.00±228.35  | 4.67±0.73        | 0.05±0.03        | 2548.33±993.02  | 1719.00±586.73 |
| Fib   | 775.33±84.52   | 4.02±0.23        | 0.07±0.01        | 4144.67±1876.61 | 1551.67±95.87  |

---

4

5

6

7

8

9

10

11

12

13

14

1 **Fig 1 Effects of different diets on DSS induced colitis in the mice**

2 Five groups (Sta, Sug, Fat, Pro, Fib) received 2.5% DSS in drinking  
3 water for 7 days. (A) Colon length in six groups. (B) The change of  
4 body weight in six groups on the seventh day. (C) DAI in six groups on  
5 the seventh day. (D) Normal control mice colon on day 7 showed well  
6 organized crypts and lamina propria and submucosal structures. (E),  
7 (F), (G), (H), (I): Histological analysis of representative colons from the  
8 mice in Sta, Sug, Fat, Fib and Pro groups, respectively. (original  
9 magnification, HE staining, 100 ×). \*: P<0.05, compared to the Con  
10 group. #: P<0.05, compared to the Sta group. &: P<0.05, compared to  
11 the Fib group. a: P<0.05, compared to the Pro group.

12

13 **Fig 2 Effects of feeding order of high fiber and high protein on**  
14 **DSS induced colitis in the mice**

15 Five groups (Sta, Pro+Fib, Pro, Fib+Pro, Fib) received 2.5% DSS in  
16 drinking water for 7 days. (A) Colon length in the six groups. (B) The  
17 change of body weight in all groups on the 7th day after drinking DSS.  
18 (C) DAI in six groups on the 7th day after drinking DSS. (D) Normal  
19 control mice colon on the 7th day showed well organized crypts and

1 lamina propria and submucosal structures. (E), (F), (G), (H), (I),  
2 Histological analysis of representative colons from the mice in Sta,  
3 Pro+Fib, Pro, Fib+Pro and Fib groups, respectively. (original  
4 magnification, HE staining, 100 ×). \*: P<0.05, compared to the Con  
5 group. #: P<0.05, compared to the Sta group. &: P<0.05, compared to  
6 the Fib group. a: P<0.05, compared to the Pro group.

7

8 **Fig 3 Effects of different diets on the expression of MUC2, TLR2,**  
9 **TLR4, TLR5, IL-1 $\beta$  and IL-6**

10 A:The expression of IL-1 $\beta$ mRNA relative to the the Sta group after  
11 adding DSS, \*: P<0.05, compared to the Pro group. B:The expression  
12 of IL-6 mRNA relative to the the Sta group after adding DSS, \*: P<0.05,  
13 compared to the Fib group. C: The expression of MUC2 mRNA  
14 relative to the the Sta group before adding DSS. D: The expression of  
15 TLR2 mRNA relative to the the Sta group before adding DSS. \*: P<0.05,  
16 compared to the Sug group. E: The expression of TLR4  
17 mRNA relative to the the Sta group before adding DSS. F: The  
18 expression of TLR5 mRNA relative to the the Sta group before adding  
19 DSS.

20



1 **Fig 4 Microbial diversity in the gut of mice consuming different**  
2 **diets**

3 Genomic DNA was extracted from the caecal content of randomly  
4 selected mice (3/group) and amplified using primers targeting the V1  
5 to V3 hypervariable regions of bacterial 16S rRNA. (A) The Venn  
6 Diagram showed the differences and similarities in the Sug, Fat, Pro  
7 and Fib groups. (B)The heatmap showed the relative abundance of  
8 bacteria in the six groups (Con, Sta, Sug, Fat, Fib, Pro) in genus.  
9 Each column represented the abundance profile for a sample. (C) Bar  
10 chart showed the relative abundance of bacteria in the six groups  
11 (Con, Sta, Sug, Fat, Fib, Pro) in dominant species.

12

13 **Fig 5 Microbial diversity after changing the feeding order of high**  
14 **fiber and high protein**

15 Genomic DNA was extracted from the caecal content of randomly  
16 selected mice (3/group) and amplified using primers targeting the V1  
17 to V3 hypervariable regions of bacterial 16S rRNA. (A) The Venn  
18 Diagram showed the differences and similarities in the Pro, Fib,  
19 Pro+Fib and Fib+Pro groups. (B) The heatmap showed the relative  
20 abundance of bacteria in the four groups (Pro+Fib, Pro, Fib+Pro, Fib)

1 in genus. Each column represented the abundance profile for a  
2 sample. (C) Bar chart showed the relative abundance of bacteria in  
3 the four groups (Pro+Fib, Pro, Fib+Pro, Fib) in dominant species.

4

5

6



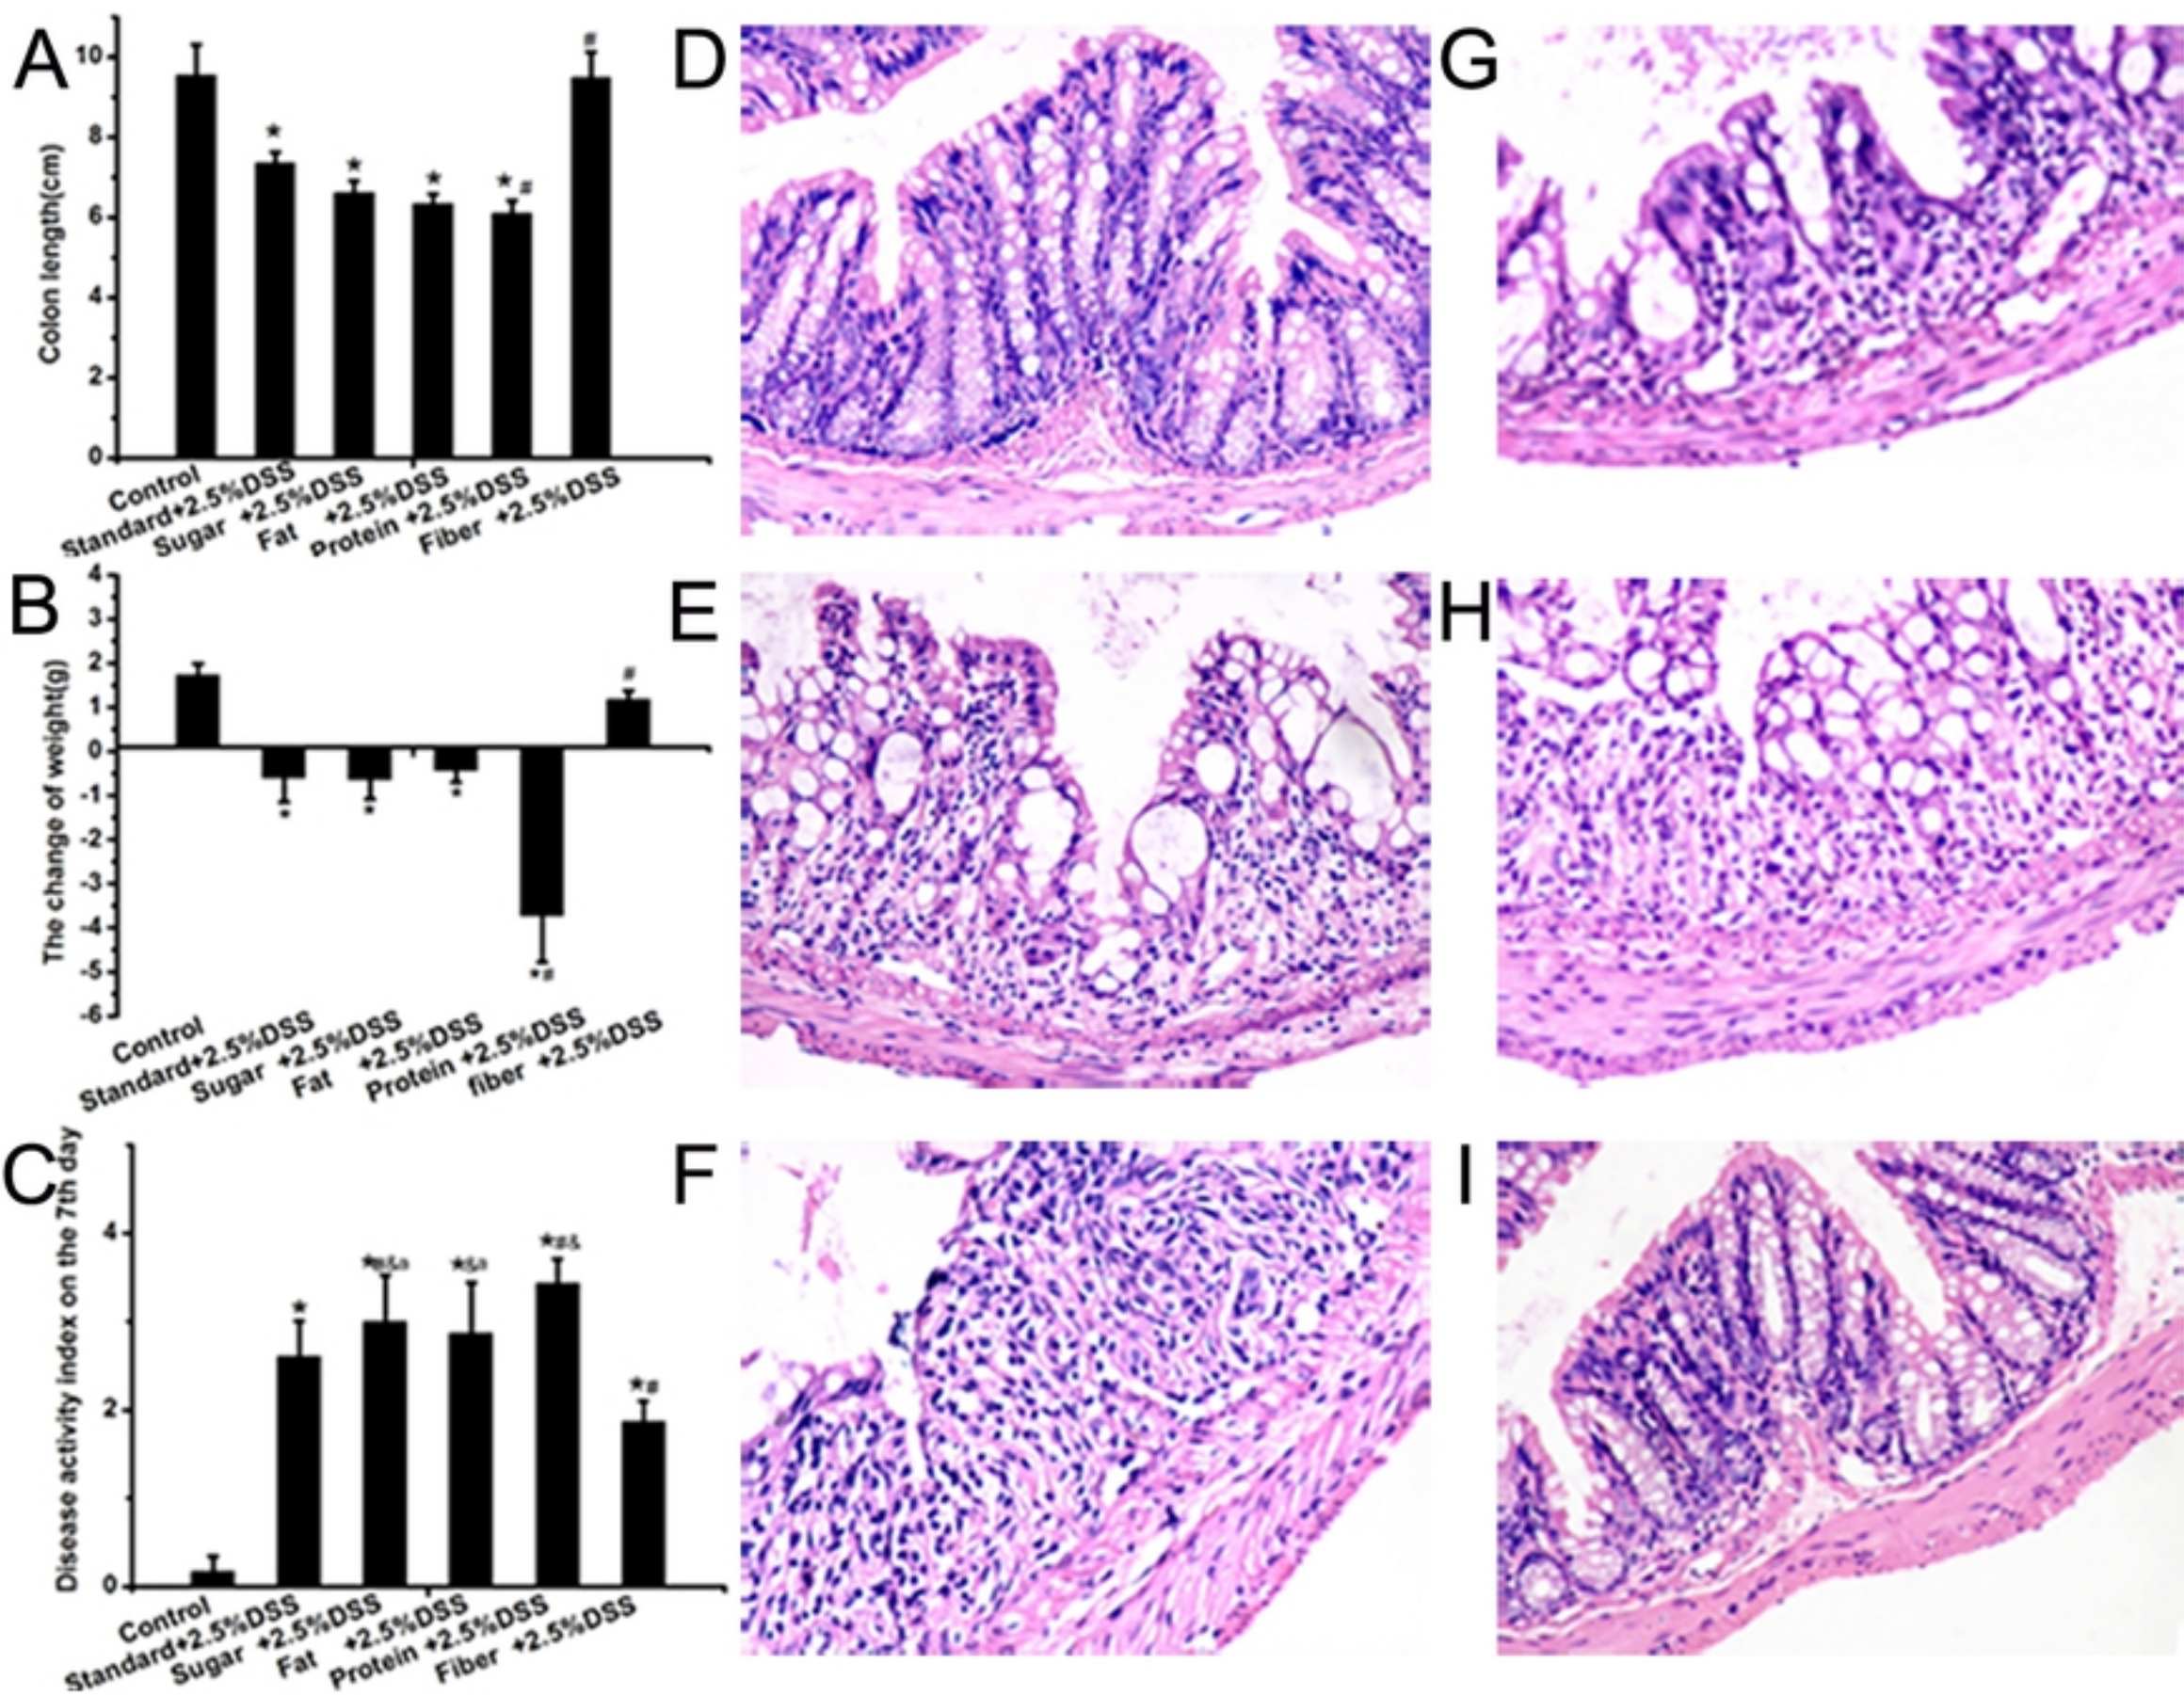

Figure 1



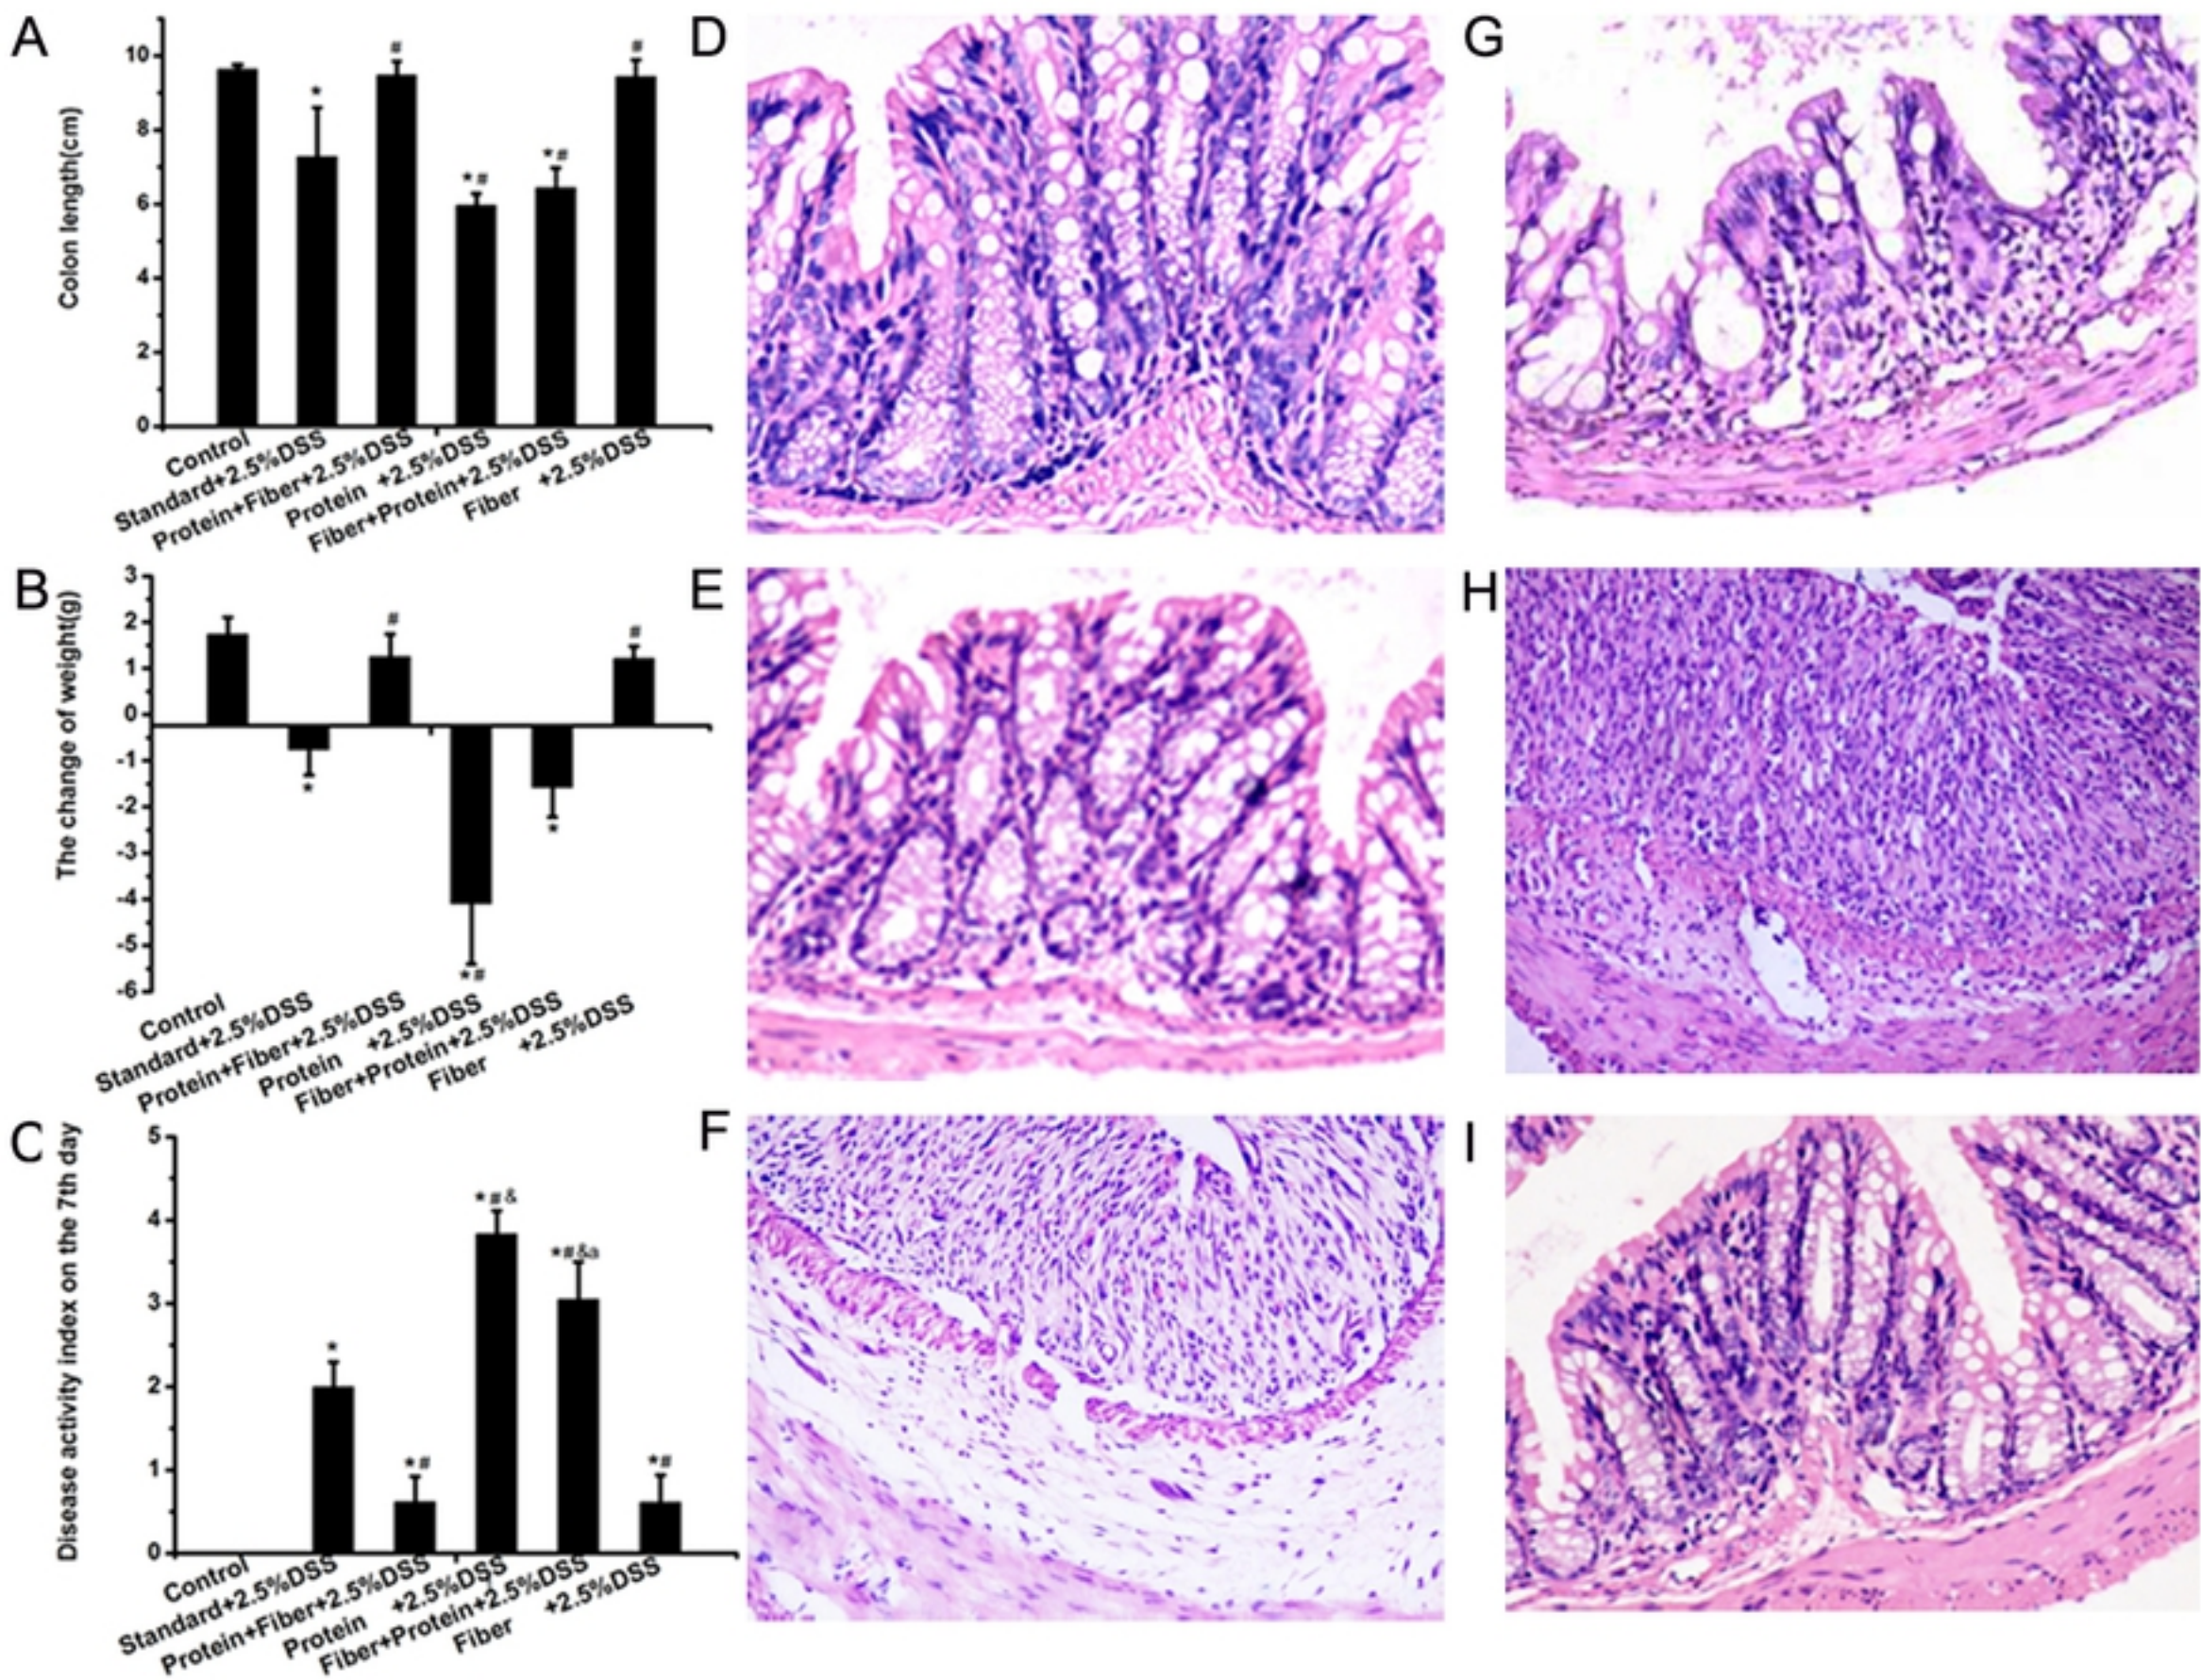

Figure 2



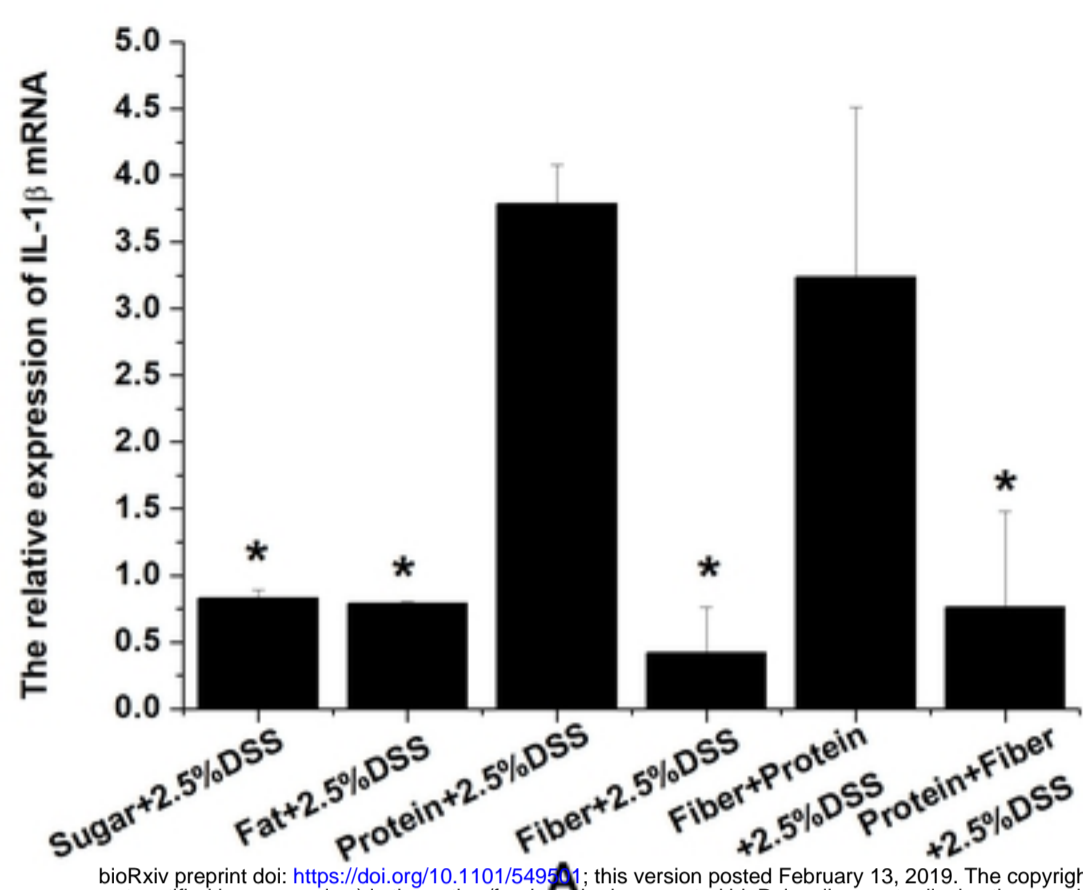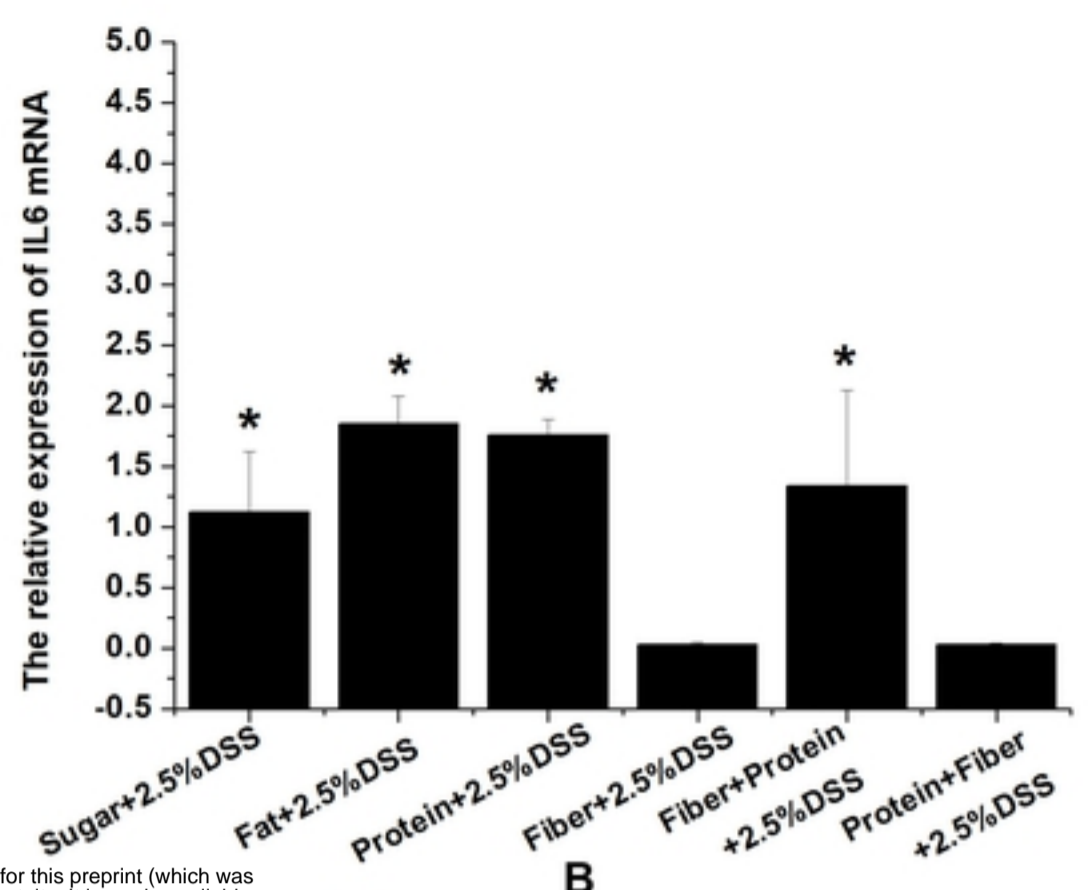

bioRxiv preprint doi: <https://doi.org/10.1101/549501>; this version posted February 13, 2019. The copyright holder for this preprint (which was not certified by peer review) is the author/funder, who has granted bioRxiv a license to display the preprint in perpetuity. It is made available under aCC-BY 4.0 International license.

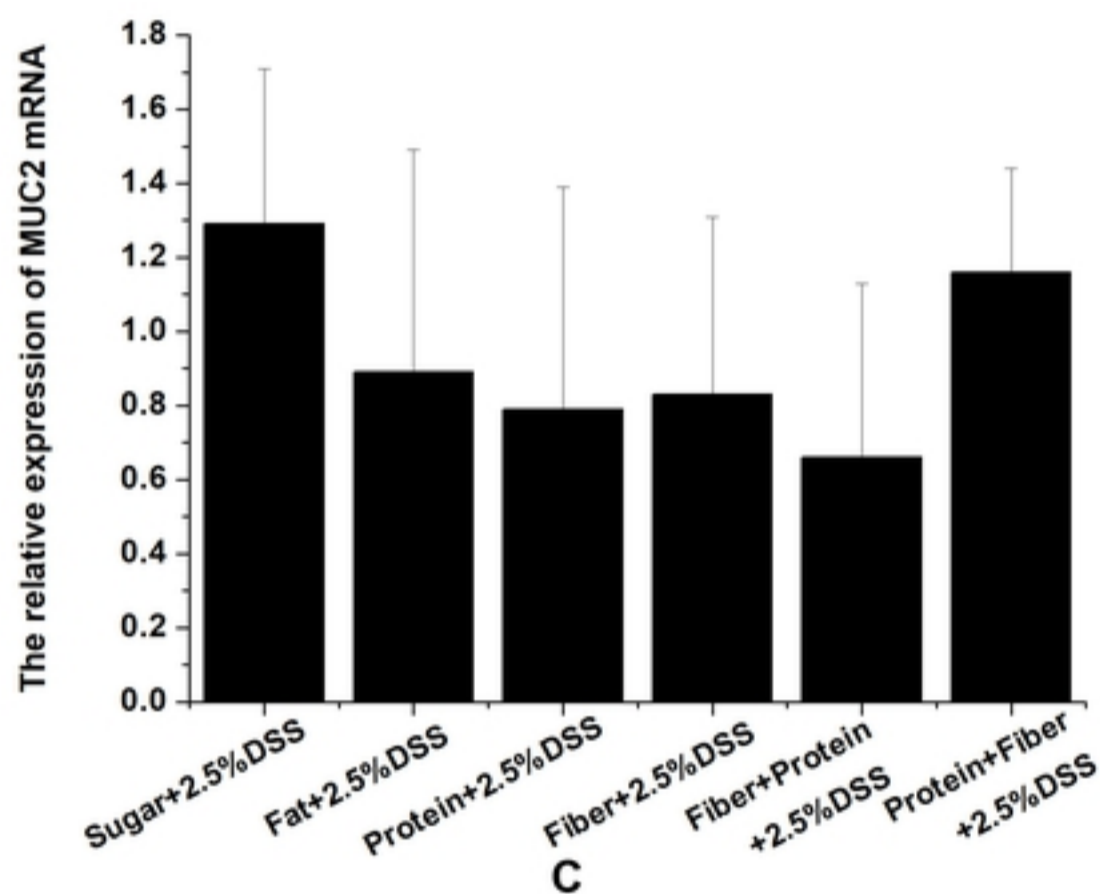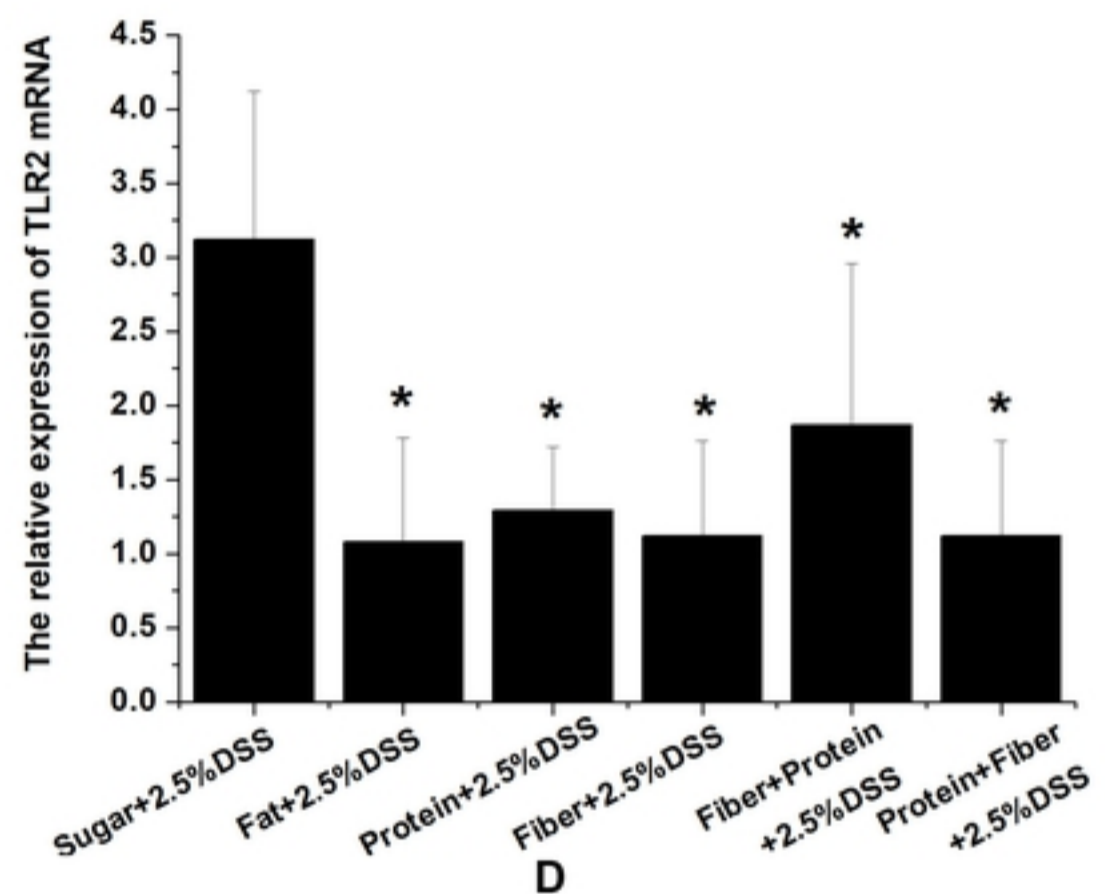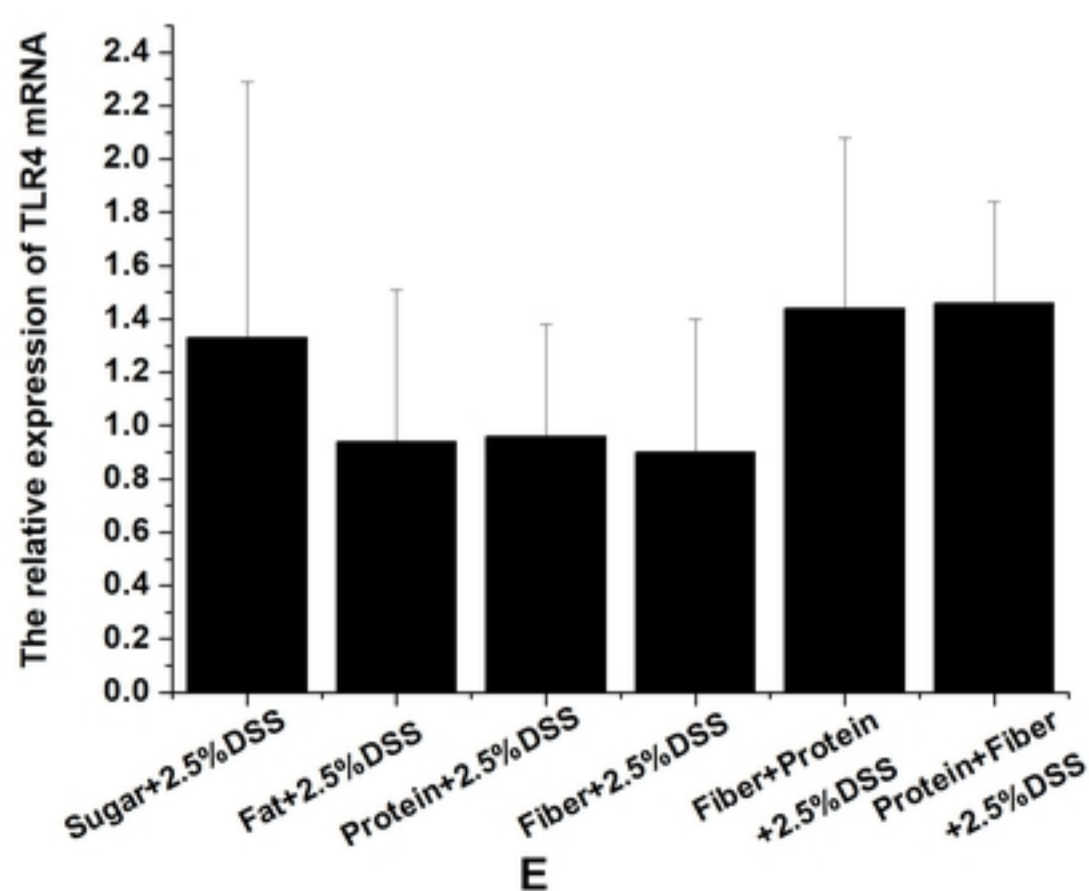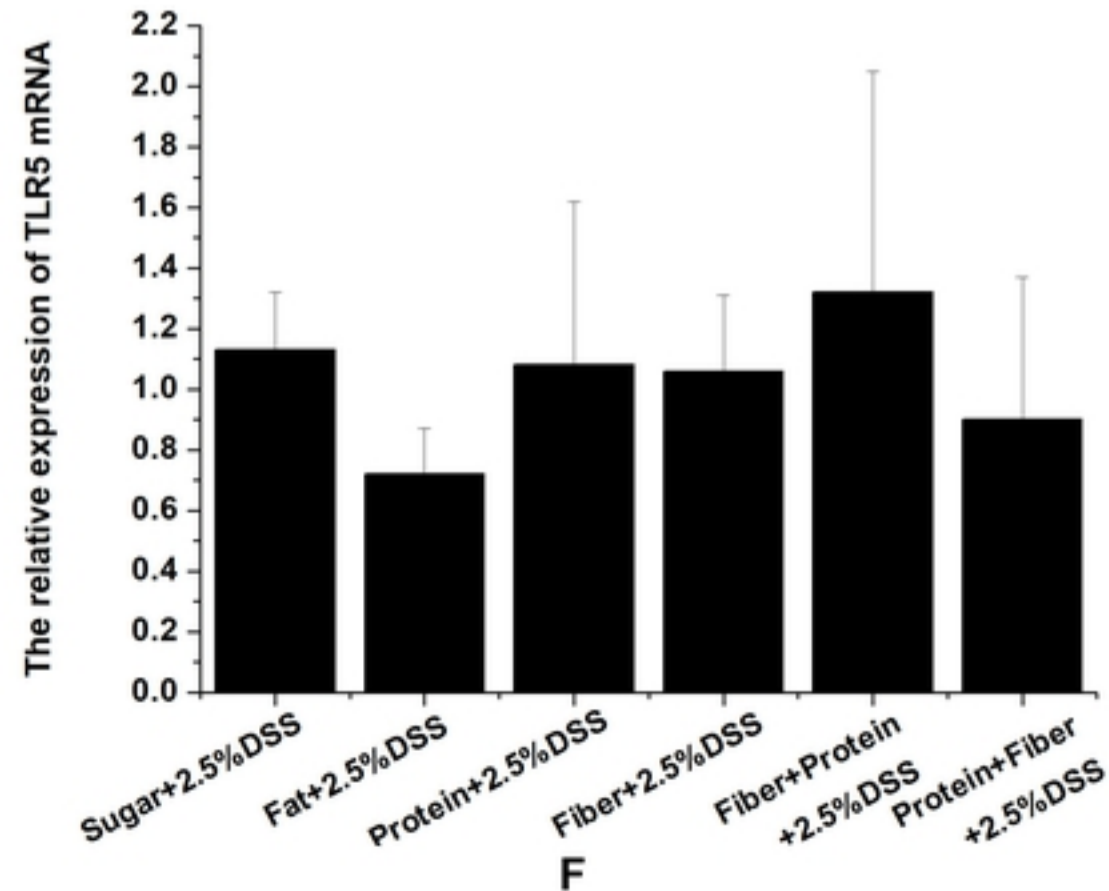

Figure 3

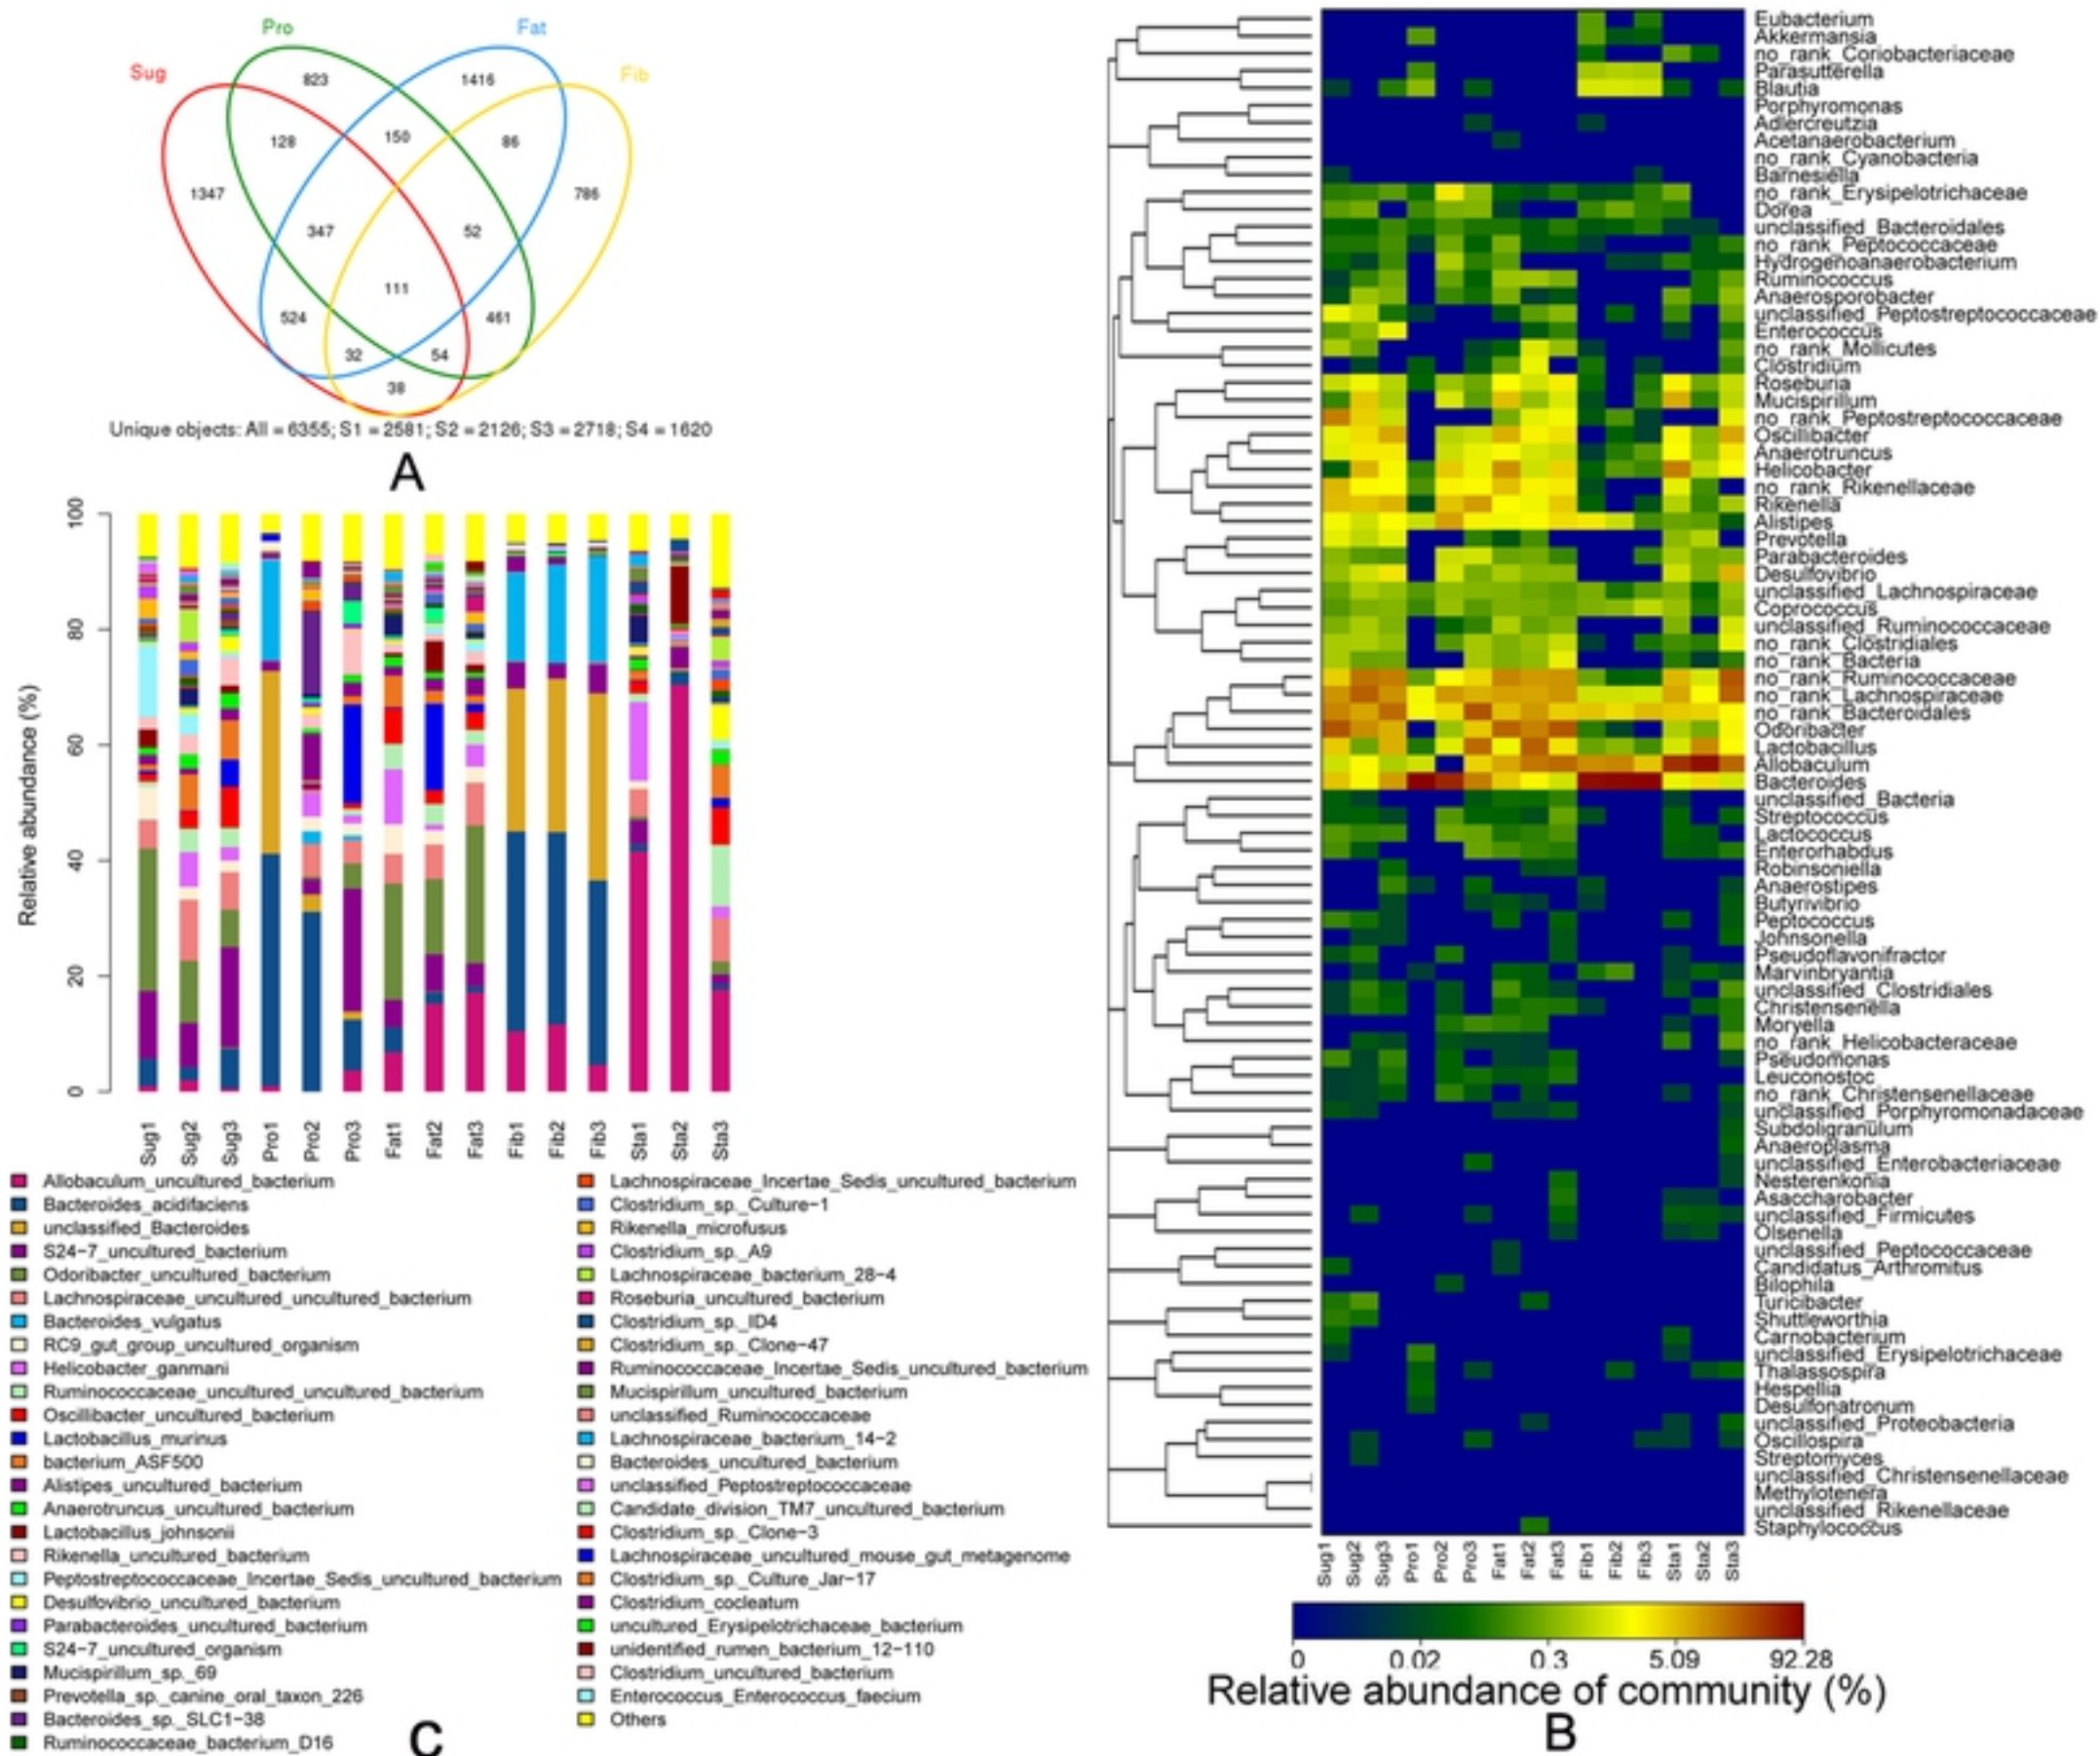

Figure 4



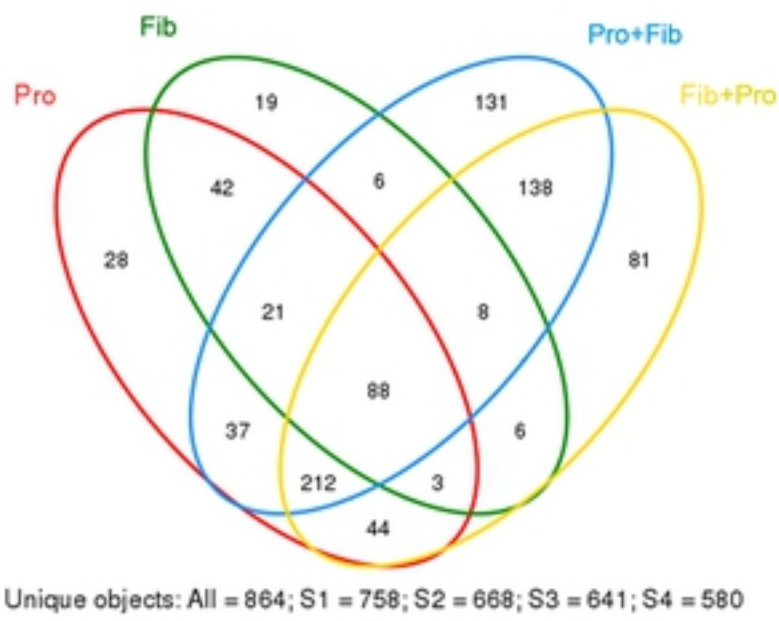

A

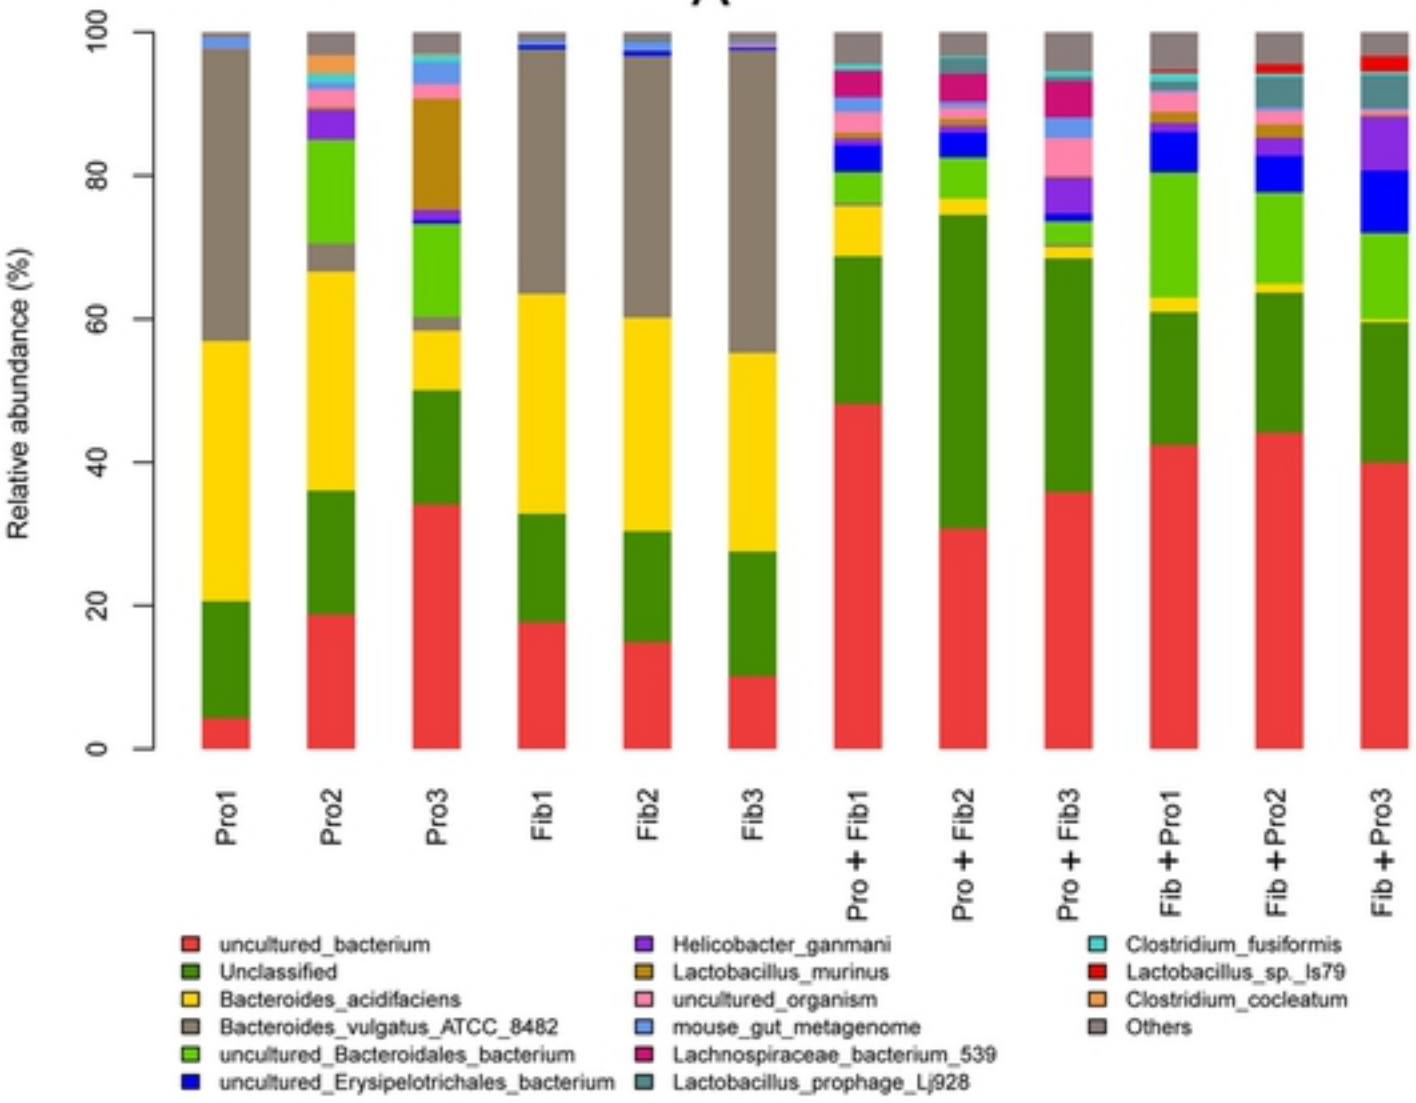

C

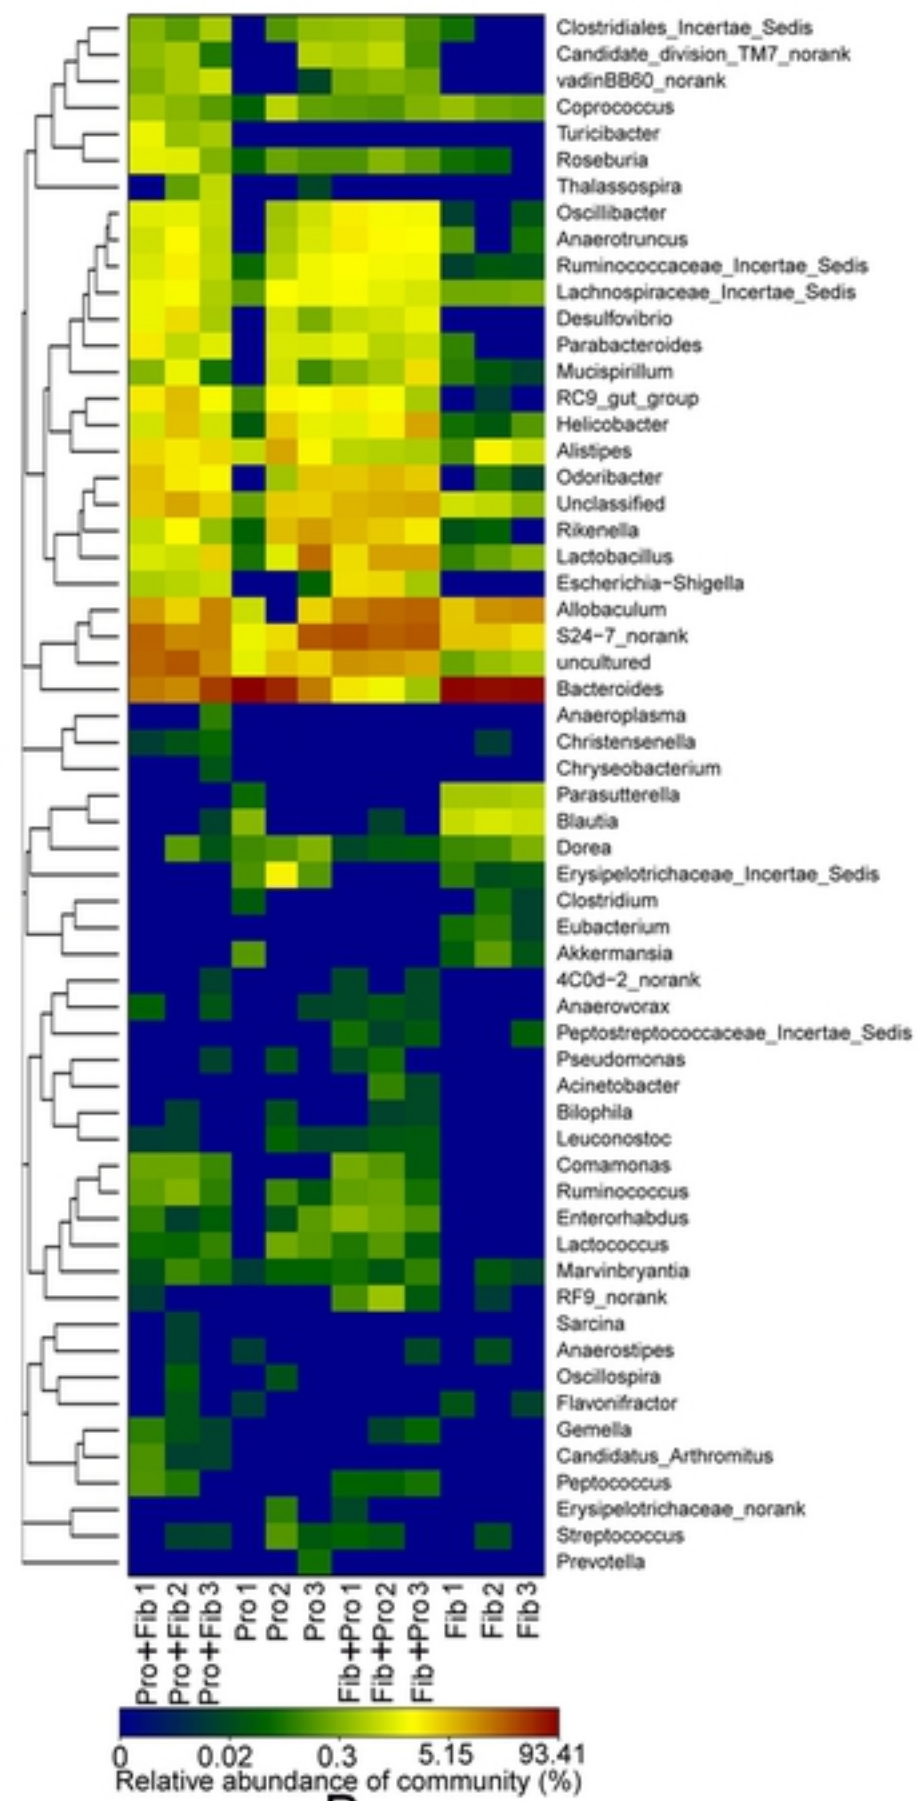

B

Figure 5
